# Supplementary material
Source: PubMed Central journal article supplement (PMC4290722)

A

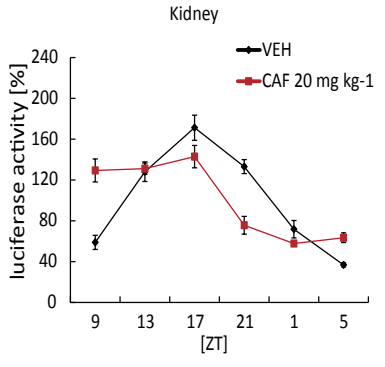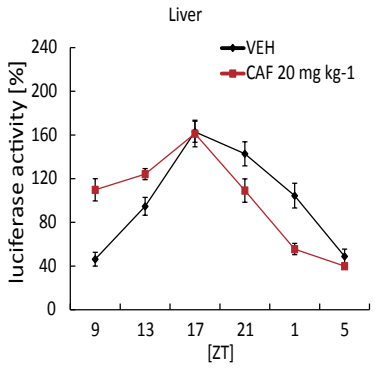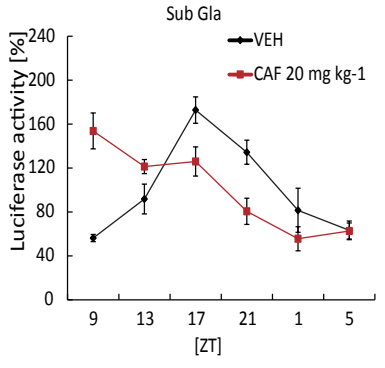

B

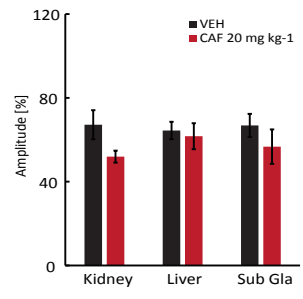

C

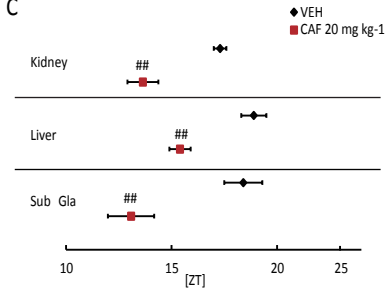

Supplement: bph0171-5858-sd7.pdf [file bph0171-5858-sd7.pdf]
